# Supplementary material for: A pH-responsive Pt-based nanoradiosensitizer for enhanced radiotherapy via oxidative stress amplification
Source: Royal Society of Chemistry journal article supplement (doi:10.1039/d1nr02043a), 2021-01-01
Supplement: d1nr02043a1.pdf [file d1nr02043a1.pdf]

## Supporting Information

### **pH-responsive Pt-based nanoradiosensitizer for enhanced radiotherapy via oxidative stress amplification**

Licheng Yu,<sup>a</sup> Xiaolei Zhang,<sup>a</sup> Xiaomin Li,<sup>a</sup> Zhenjie Zhang,<sup>a</sup> Xiaoyan Niu,<sup>a</sup>  
Xiaohui Wang,<sup>a</sup> Wei Wang,<sup>a</sup> and Zhi Yuan <sup>\*a</sup>

<sup>a</sup> Key Laboratory of Functional Polymer Materials, Institute of Polymer Chemistry,  
College of Chemistry, Nankai University, Tianjin 300071, China.

\* Corresponding author

Prof. Zhi Yuan

E-mail address: zhiy@nankai.edu.cn

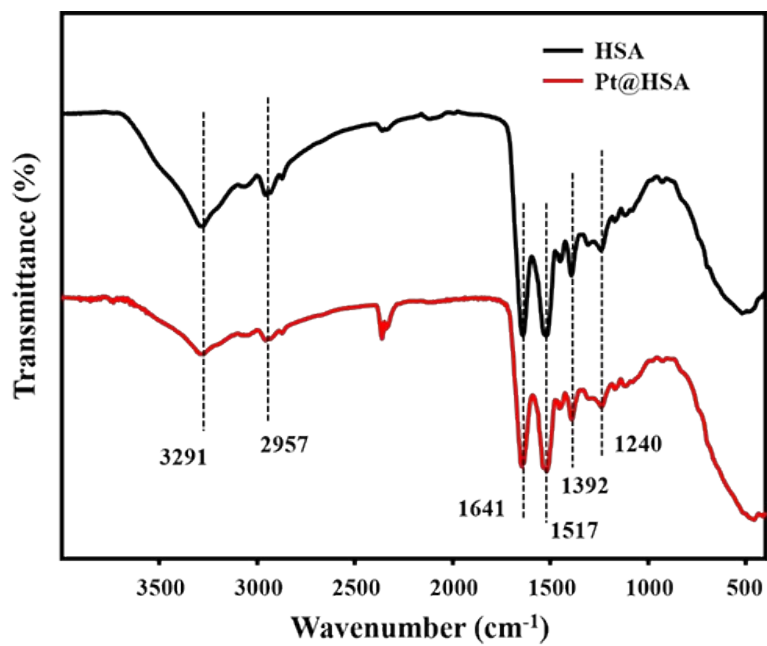

Figure S1. FTIR spectra of HSA and Pt@HSA NPs.

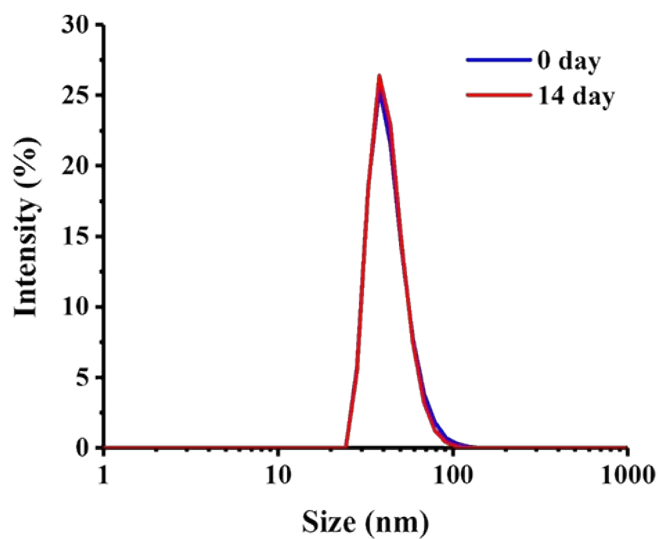

Figure S2. The hydrodynamic diameters of Pt@HSA/CA NPs in DMEM medium containing 10% serum at 0 day and 14 day.

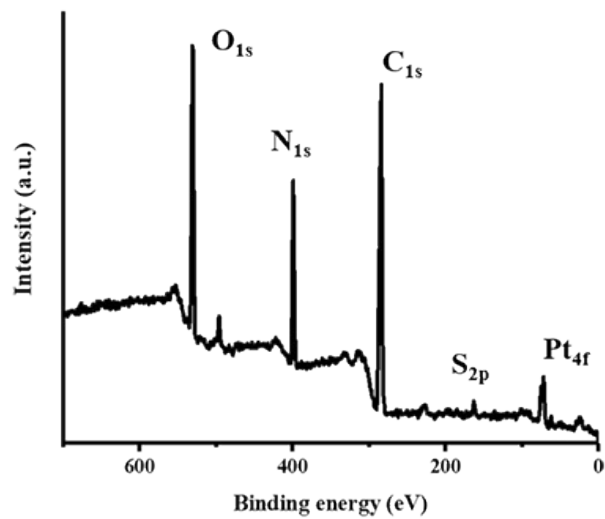

Figure S3. XPS of Pt@HSA/CA NPs.

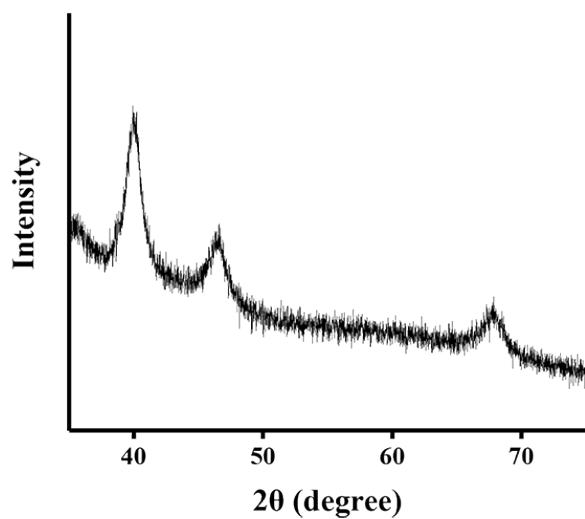

Figure S4. XRD spectrum of Pt@HSA/CA NPs.

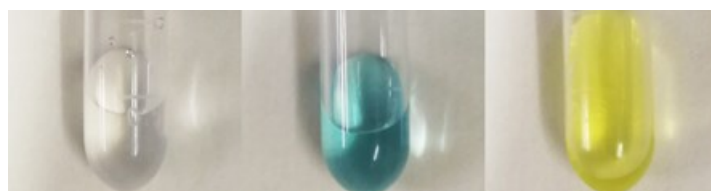

Figure S5. Photographs of TMB+H<sub>2</sub>O<sub>2</sub>, TMB+H<sub>2</sub>O<sub>2</sub>+Pt@HSA/CA NPs, and TMB+H<sub>2</sub>O<sub>2</sub>+Pt@HSA/CA NPs+H<sub>2</sub>SO<sub>4</sub>.

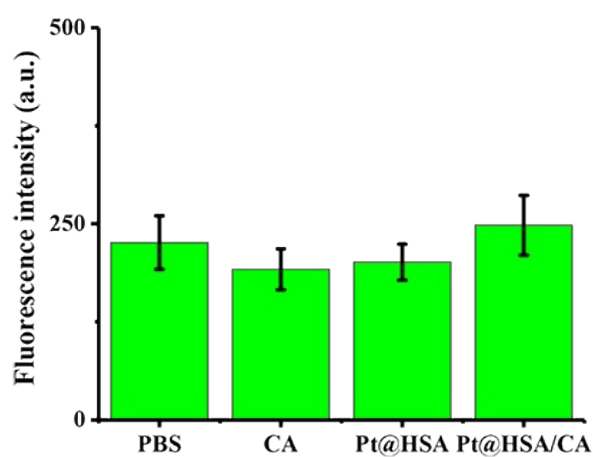

Figure S6. ROS production without X-ray irradiation. The fluorescence probe was DCFH-DA (10  $\mu$ M).

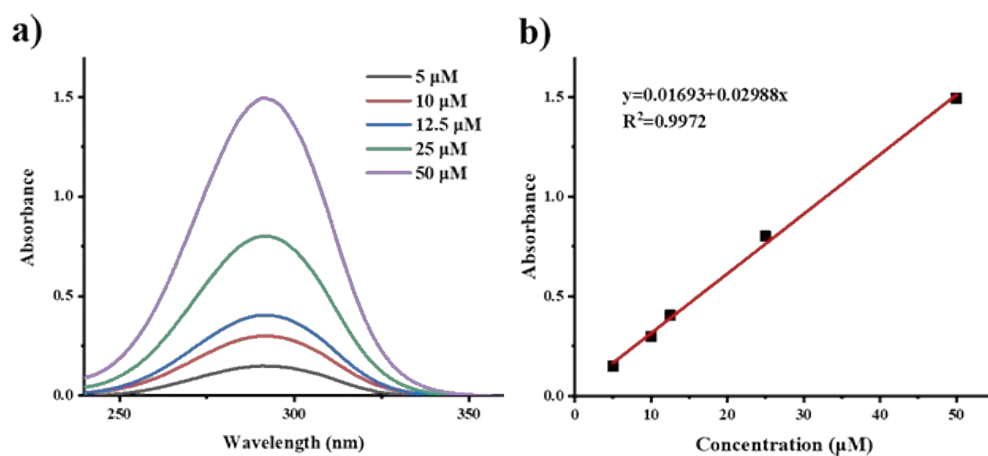

Figure S7. a) UV-vis spectra of different concentration of CA. b) The concentration standard curve of CA.

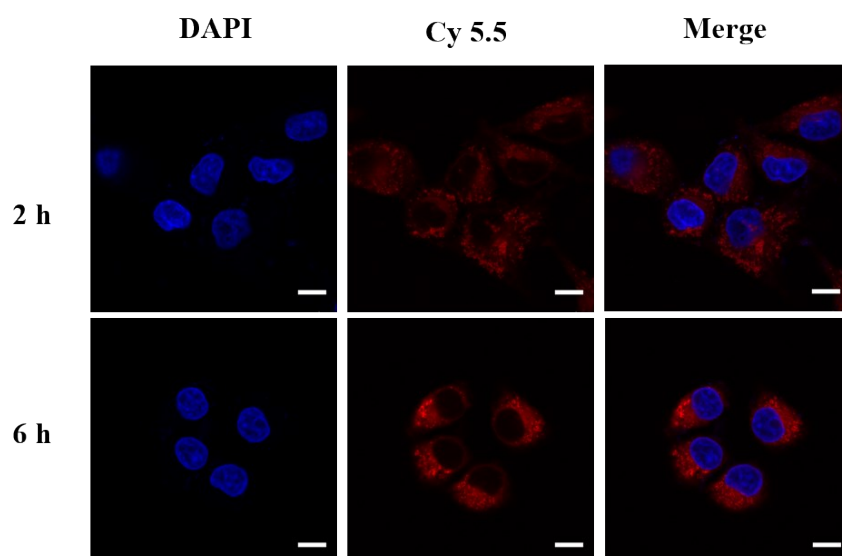

Figure S8. Fluorescence images of HepG2 cellular uptake of Pt@HSA/CA NPs. Scale bar: 10  $\mu\text{m}$ .

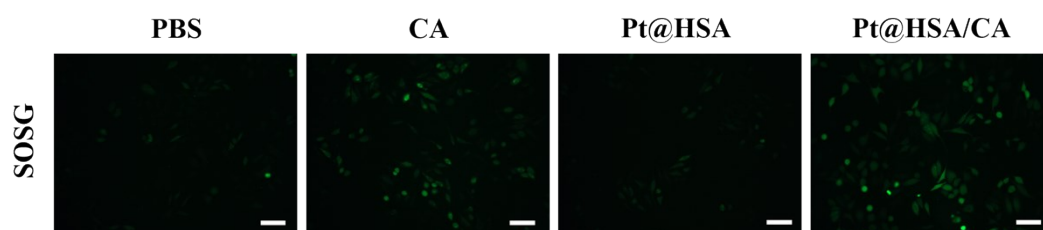

Figure S9. Fluorescence images of intracellular  $^1\text{O}_2$  level in HepG2 cells under different conditions. Scale bar: 100  $\mu\text{m}$ .

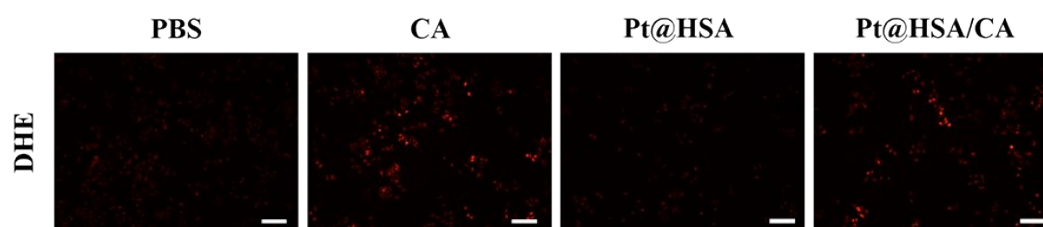

Figure S10. Fluorescence images of intracellular  $\text{O}_2^{\cdot-}$  level in HepG2 cells under different conditions. Scale bar: 200  $\mu\text{m}$ .

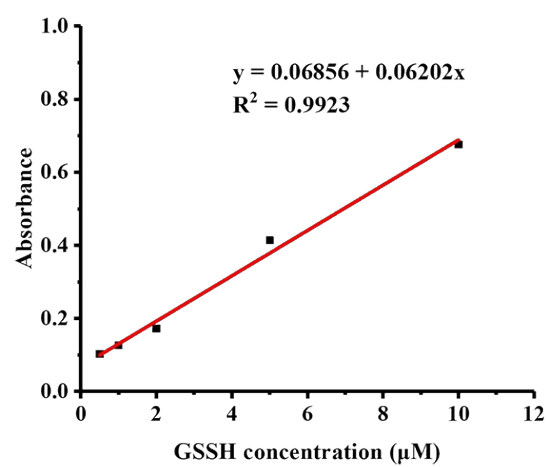

Figure S11. The standard curve of GSSH concentration.

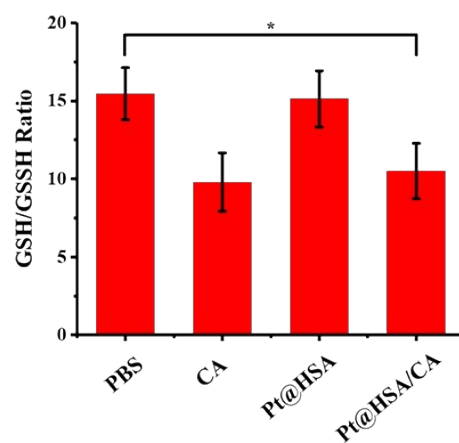

Figure S12. The intracellular GSH/GSSG ratio of solution after different treatments.

\* $p < 0.05$ .

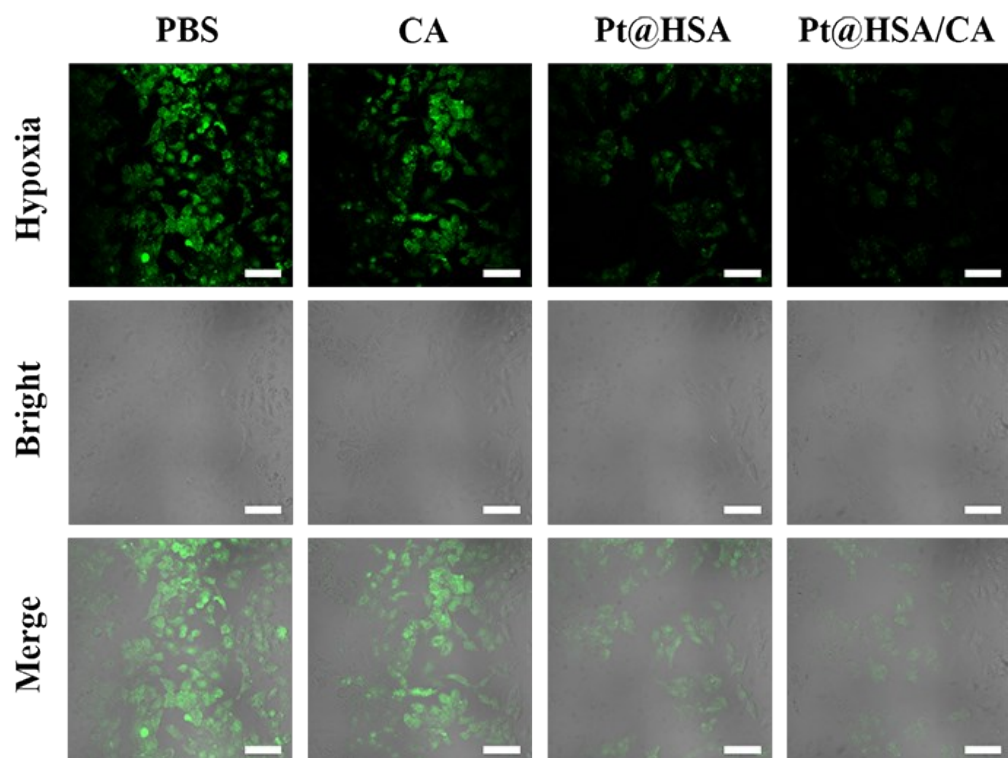

Figure S13. CLSM images of anti-pimonidazole antibody (green) stained HepG2 cells.

Scale bar: 100  $\mu\text{m}$ .

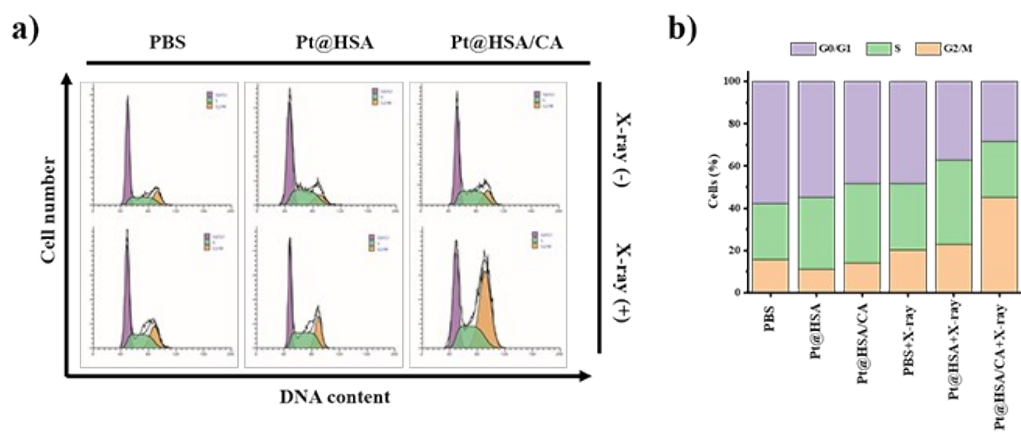

Figure S14. **a)** Cell cycle changes of HepG2 cells under different treatments. **b)**

Percentage of HepG2 cells in different cell phases.

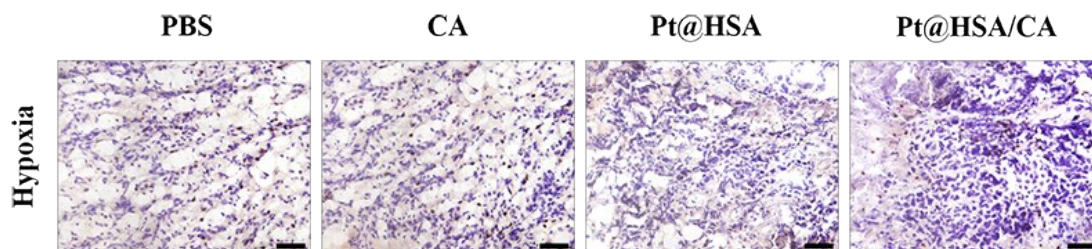

Figure S15. Anti-pimonidazole immunohistochemistry images of different tumor sections. Scale bar: 50  $\mu$ m.

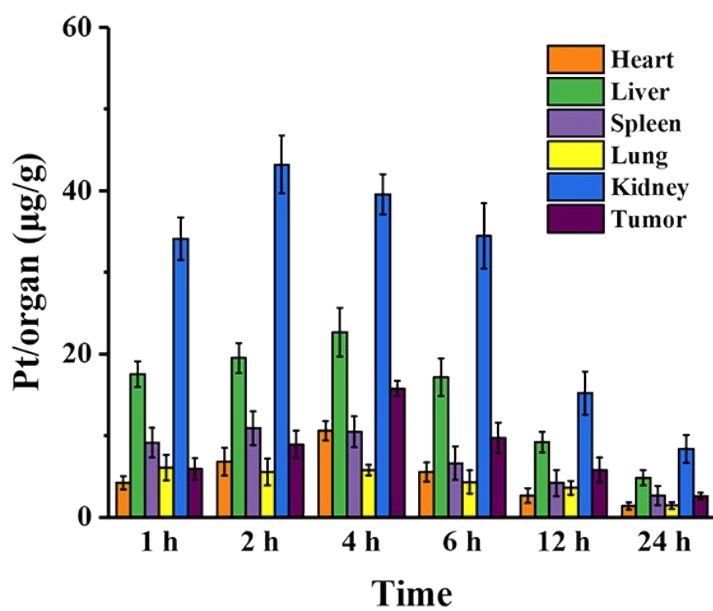

Figure S16. The biodistribution of Pt element in heart, liver, spleen, lung, kidney, and tumor at 1, 2, 4, 6, 12, and 24 h post-intravenous injection.



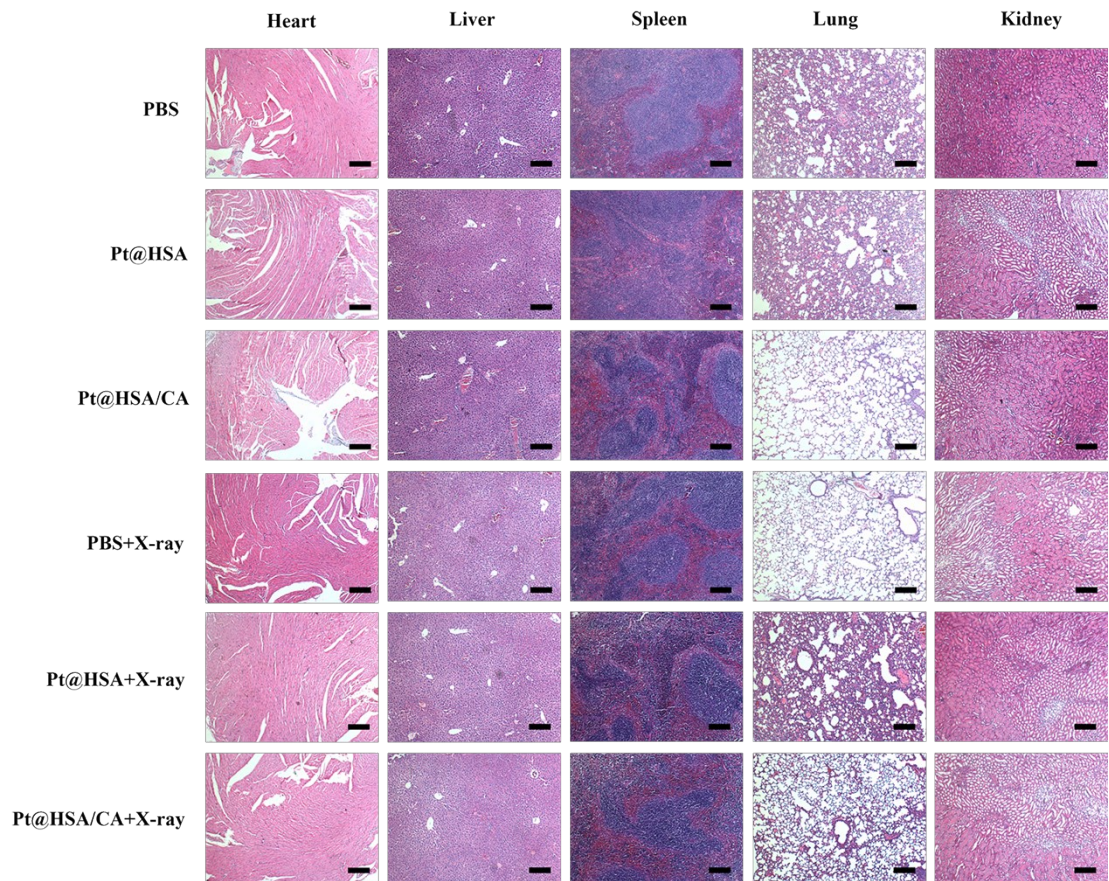

Figure S17. Images of H&E stained slices of major organs after different treatments.

Scale bar: 100  $\mu$ m.

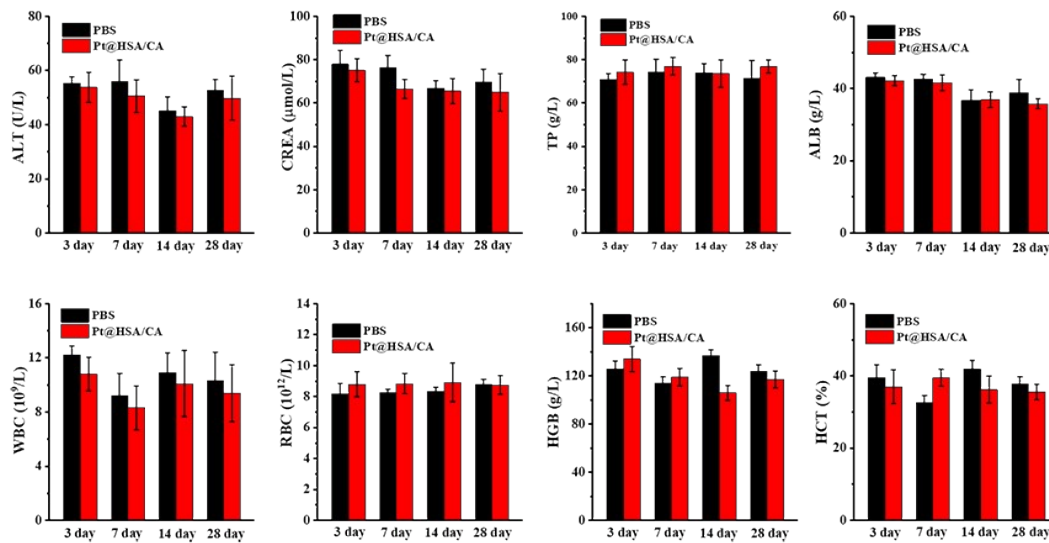

Figure S18. Blood biochemistry and hematology data of the mice treated with Pt@HSA/CA NPs. All the data were collected at the different time points of 3, 7, 14, and 28 day after intravenous injection.

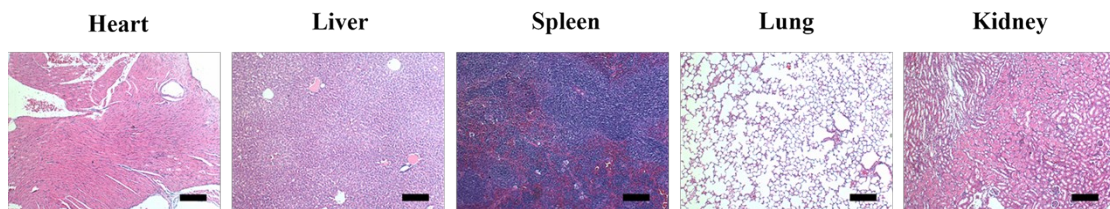

Figure S19. Images of H&E stained slices of major organs after 28 days. Scale bar: 100 μm.

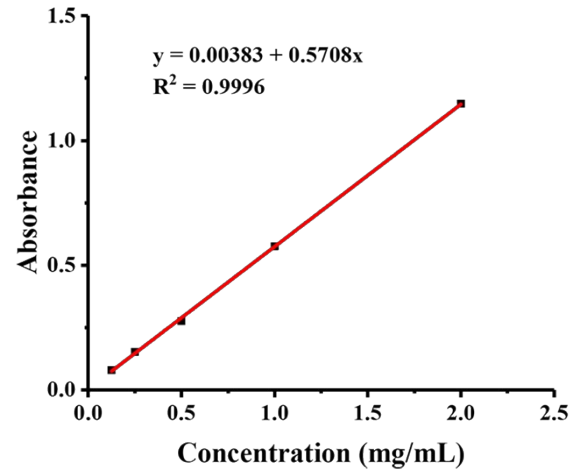

Figure S20. The standard curve of HSA concentration.
